# Supplementary material for: A Pooled Analysis of Continued Prophylactic Efficacy of Quadrivalent Human Papillomavirus (Types 6/11/16/18) Vaccine against High-grade Cervical and External Genital Lesions
Source: Oxford University Press journal article supplement (doi:10.1158/1940-6207.capr-09-0031), 2009-09-29
Supplement: 19406207capr090031-sup-capr_09-0031_tab_1-2_284k.pdf [file 19406207capr090031-sup-capr_09-0031_tab_1-2_284k.pdf]

SUPPLEMENTARY TABLES

Table S1. Analysis of efficacy against HPV 6/11/16/18-related high-grade cervical lesions (CIN 2 or worse) by additional categories of baseline covariates

|                                                                    | Per-protocol population  |      |          |      |              |               | Intention-to-treat population |      |           |      |               |              |
|--------------------------------------------------------------------|--------------------------|------|----------|------|--------------|---------------|-------------------------------|------|-----------|------|---------------|--------------|
|                                                                    | Quadrivalent HPV vaccine |      | Placebo  |      | Efficacy (%) | 95% CI        | Quadrivalent HPV vaccine      |      | Placebo   |      | Reduction (%) | 95% CI       |
|                                                                    | Cases/n                  | Rate | Cases/n  | Rate |              |               | Cases/n                       | Rate | Cases/n   | Rate |               |              |
| <b>Number of sexual partners in the 6 months before enrollment</b> |                          |      |          |      |              |               |                               |      |           |      |               |              |
| 0                                                                  | 1/5,192                  | 0.0  | 62/5,071 | 0.4  | 98.4         | (90.9, 100.0) | 91/5,825                      | 0.5  | 168/5,731 | 0.9  | 47.0          | (31.1, 59.4) |
| 1                                                                  | 1/1,881                  | 0.0  | 32/1,929 | 0.6  | 96.8         | (81.0, 99.9)  | 46/2,127                      | 0.6  | 92/2,185  | 1.2  | 48.6          | (26.1, 64.8) |
| ≥2                                                                 | 0/326                    | 0.0  | 8/355    | 0.8  | 100.0        | (37.8, 100.0) | 4/370                         | 0.3  | 25/402    | 1.8  | 83.1          | (51.1, 95.7) |
| Covariate by efficacy interaction                                  | <i>p</i> = 1.00          |      |          |      |              |               | <i>p</i> = 0.090              |      |           |      |               |              |
| <b>Day 1 PCR Status</b>                                            |                          |      |          |      |              |               |                               |      |           |      |               |              |
| Negative to HPV 6/11/16/18                                         | 2/6,741                  | 0.0  | 98/6,780 | 0.5  | 98.0         | (92.4, 99.8)  | 4/7,385                       | 0.0  | 135/7,474 | 0.5  | 97.0          | (92.2, 99.2) |
| Positive to HPV 6/11/16/18                                         | 0/1,082                  | 0.0  | 12/1,054 | 0.4  | 100.0        | (65.6, 100.0) | 137/1,298                     | 3.4  | 155/1,275 | 3.9  | 12.9          | (<0.0, 31.3) |
| Covariate by efficacy interaction                                  | <i>p</i> = 1.00          |      |          |      |              |               | <i>p</i> < 0.001              |      |           |      |               |              |
| <b>Day 1 Sero Status</b>                                           |                          |      |          |      |              |               |                               |      |           |      |               |              |
| Negative to HPV 6/11/16/18                                         | 2/6,417                  | 0.0  | 96/6,420 | 0.5  | 97.9         | (92.3, 99.8)  | 45/7,086                      | 0.2  | 184/7,112 | 0.7  | 75.6          | (66.0, 82.8) |
| Positive to HPV 6/11/16/18                                         | 0/1,446                  | 0.0  | 14/1,445 | 0.3  | 100.0        | (70.1, 100.0) | 97/1,729                      | 1.7  | 109/1,739 | 1.9  | 10.4          | (<0.0, 32.5) |
| Covariate by efficacy interaction                                  | <i>p</i> = 1.00          |      |          |      |              |               | <i>p</i> < 0.001              |      |           |      |               |              |
| <b>Day 1 PCR/Sero Status</b>                                       |                          |      |          |      |              |               |                               |      |           |      |               |              |
| Negative to HPV 6/11/16/18                                         | 2/5,847                  | 0.0  | 89/5,875 | 0.5  | 97.7         | (91.6, 99.7)  | 4/6,359                       | 0.0  | 123/6,423 | 0.5  | 96.7          | (91.4, 99.1) |
| Positive to HPV 6/11/16/18                                         | 0/1,993                  | 0.0  | 21/1,970 | 0.4  | 100.0        | (81.3, 100.0) | 138/2,359                     | 1.8  | 168/2,346 | 2.2  | 18.3          | (<0.0, 35.2) |
| Covariate by efficacy interaction                                  | <i>p</i> = 1.00          |      |          |      |              |               | <i>p</i> < 0.001              |      |           |      |               |              |

n = number of subjects evaluable, i.e., number of subjects in the given population who also have at least one follow-up visit; CI = confidence interval; Rate = rate per 100 person years at risk.

Table S2. Analysis of efficacy against HPV 6/11/16/18-related high-grade vulvar and vaginal lesions by additional categories of baseline covariates

|                                                                    | Per-protocol population  |      |          |      |              |               | Intention-to-treat population |      |          |      |               |              |
|--------------------------------------------------------------------|--------------------------|------|----------|------|--------------|---------------|-------------------------------|------|----------|------|---------------|--------------|
|                                                                    | Quadrivalent HPV vaccine |      | Placebo  |      | Efficacy (%) | 95% CI        | Quadrivalent HPV vaccine      |      | Placebo  |      | Reduction (%) | 95% CI       |
|                                                                    | Cases/n                  | Rate | Cases/n  | Rate |              |               | Cases/n                       | Rate | Cases/n  | Rate |               |              |
| <b>Number of sexual partners in the 6 months before enrollment</b> |                          |      |          |      |              |               |                               |      |          |      |               |              |
| 0                                                                  | 0/5,212                  | 0.0  | 10/5,093 | 0.1  | 100.0        | (56.4, 100.0) | 6/5,907                       | 0.0  | 20/5,794 | 0.1  | 70.6          | (24.0, 90.3) |
| 1                                                                  | 0/1,896                  | 0.0  | 7/1,941  | 0.1  | 100.0        | (29.1, 100.0) | 2/2,161                       | 0.0  | 13/2,211 | 0.2  | 84.2          | (30.1, 98.3) |
| ≥2                                                                 | 0/327                    | 0.0  | 5/357    | 0.5  | 100.0        | (<0.0, 100.0) | 1/375                         | 0.1  | 9/407    | 0.6  | 88.2          | (14.7, 99.7) |
| Covariate by efficacy interaction                                  | <i>p</i> = 1.00          |      |          |      |              |               | <i>p</i> = 0.698              |      |          |      |               |              |
| <b>Day 1 PCR Status</b>                                            |                          |      |          |      |              |               |                               |      |          |      |               |              |
| Negative to HPV 6/11/16/18                                         | 0/6,747                  | 0.0  | 22/6,794 | 0.1  | 100.0        | (81.6, 100.0) | 1/7,501                       | 0.0  | 36/7,561 | 0.1  | 97.2          | (83.3, 99.9) |
| Positive to HPV 6/11/16/18                                         | 0/1,112                  | 0.0  | 1/1,077  | 0.0  | 100.0        | (<0.0, 100.0) | 8/1,313                       | 0.2  | 7/1,295  | 0.2  | <0.0          | (<0.0, 64.4) |
| Covariate by efficacy interaction                                  | <i>p</i> = 1.00          |      |          |      |              |               | <i>p</i> <0.001               |      |          |      |               |              |
| <b>Day 1 Sero Status</b>                                           |                          |      |          |      |              |               |                               |      |          |      |               |              |
| Negative to HPV 6/11/16/18                                         | 0/6,430                  | 0.0  | 22/6,436 | 0.1  | 100.0        | (81.7, 100.0) | 3/7,193                       | 0.0  | 39/7,197 | 0.2  | 92.3          | (75.8, 98.5) |
| Positive to HPV 6/11/16/18                                         | 0/1,469                  | 0.0  | 1/1,466  | 0.0  | 100.0        | (<0.0, 100.0) | 6/1,755                       | 0.1  | 4/1,763  | 0.1  | <0.0          | (<0.0, 64.2) |
| Covariate by efficacy interaction                                  | <i>p</i> = 1.00          |      |          |      |              |               | <i>p</i> = 0.001              |      |          |      |               |              |
| <b>Day 1 PCR/Sero Status</b>                                       |                          |      |          |      |              |               |                               |      |          |      |               |              |
| Negative to HPV 6/11/16/18                                         | 0/5,851                  | 0.0  | 22/5,883 | 0.1  | 100.0        | (81.6, 100.0) | 1/6,458                       | 0.0  | 35/6,497 | 0.2  | 97.1          | (82.9, 99.9) |
| Positive to HPV 6/11/16/18                                         | 0/2,025                  | 0.0  | 1/1,999  | 0.0  | 100.0        | (<0.0, 100.0) | 8/2,391                       | 0.1  | 8/2,381  | 0.1  | 0.2           | (<0.0, 67.4) |
| Covariate by efficacy interaction                                  | <i>p</i> = 1.00          |      |          |      |              |               | <i>p</i> <0.001               |      |          |      |               |              |

n = number of subjects evaluable, i.e., number of subjects in the given population who also have at least one follow-up visit; CI = confidence interval; Rate = rate per 100 person years at risk.
